# Supplementary material for: Spectroscopic, computational and electrochemical studies on the formation of the copper complex of 1-amino-4-hydroxy-9,10-anthraquinone and effect of it on superoxide formation by NADH dehydrogenase
Source: Royal Society of Chemistry journal article supplement (doi:10.1039/c4dt03635b), 2015-01-01
Supplement: c4dt03635b1.pdf [file c4dt03635b1.pdf]

## Supporting Information (SI)

† Electronic Supporting Information (ESI) available: <sup>1</sup>H-NMR spectra, additional figures, Schemes and Tables

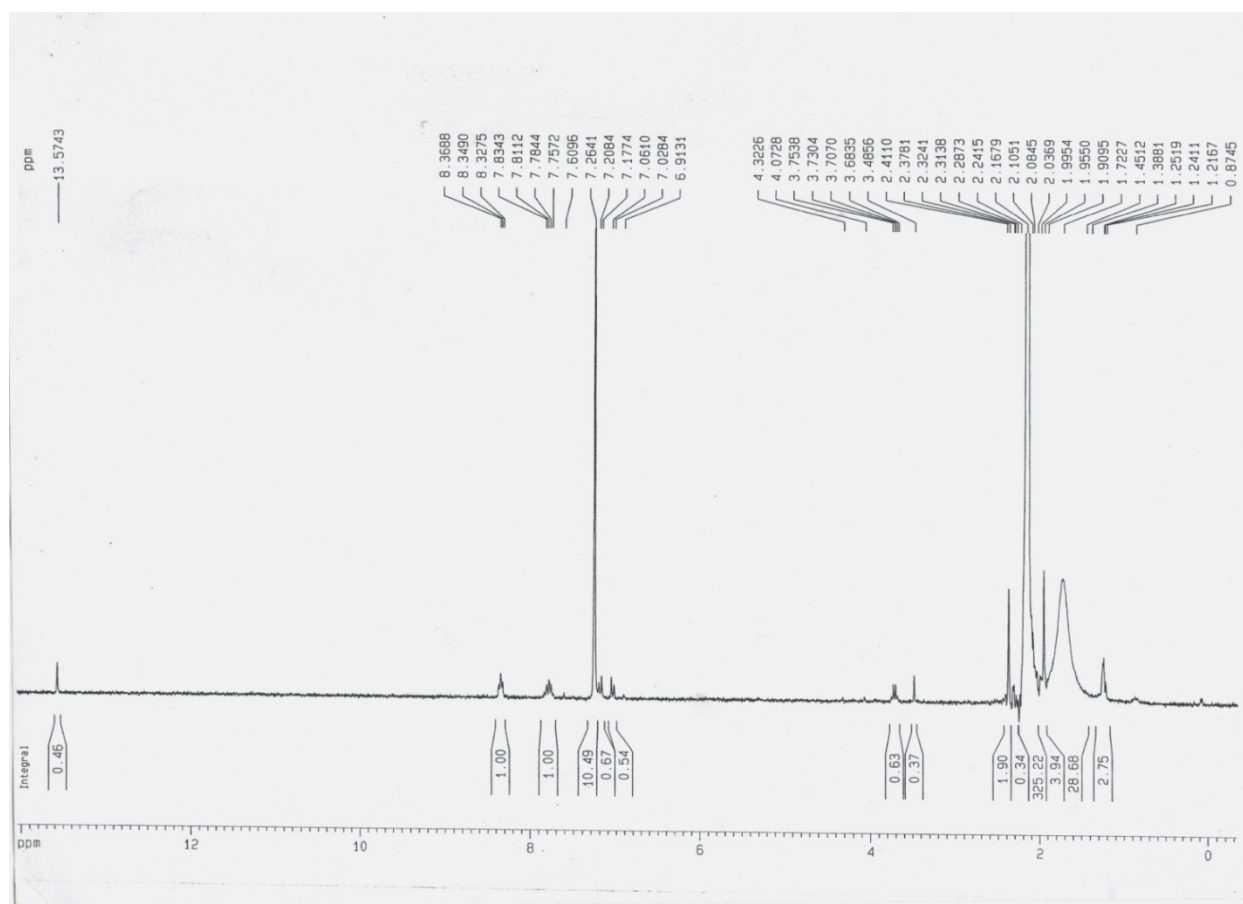

**Fig. S1** <sup>1</sup>H NMR Spectra of 1-amino-4-hydroxy-9,10-anthraquinone.

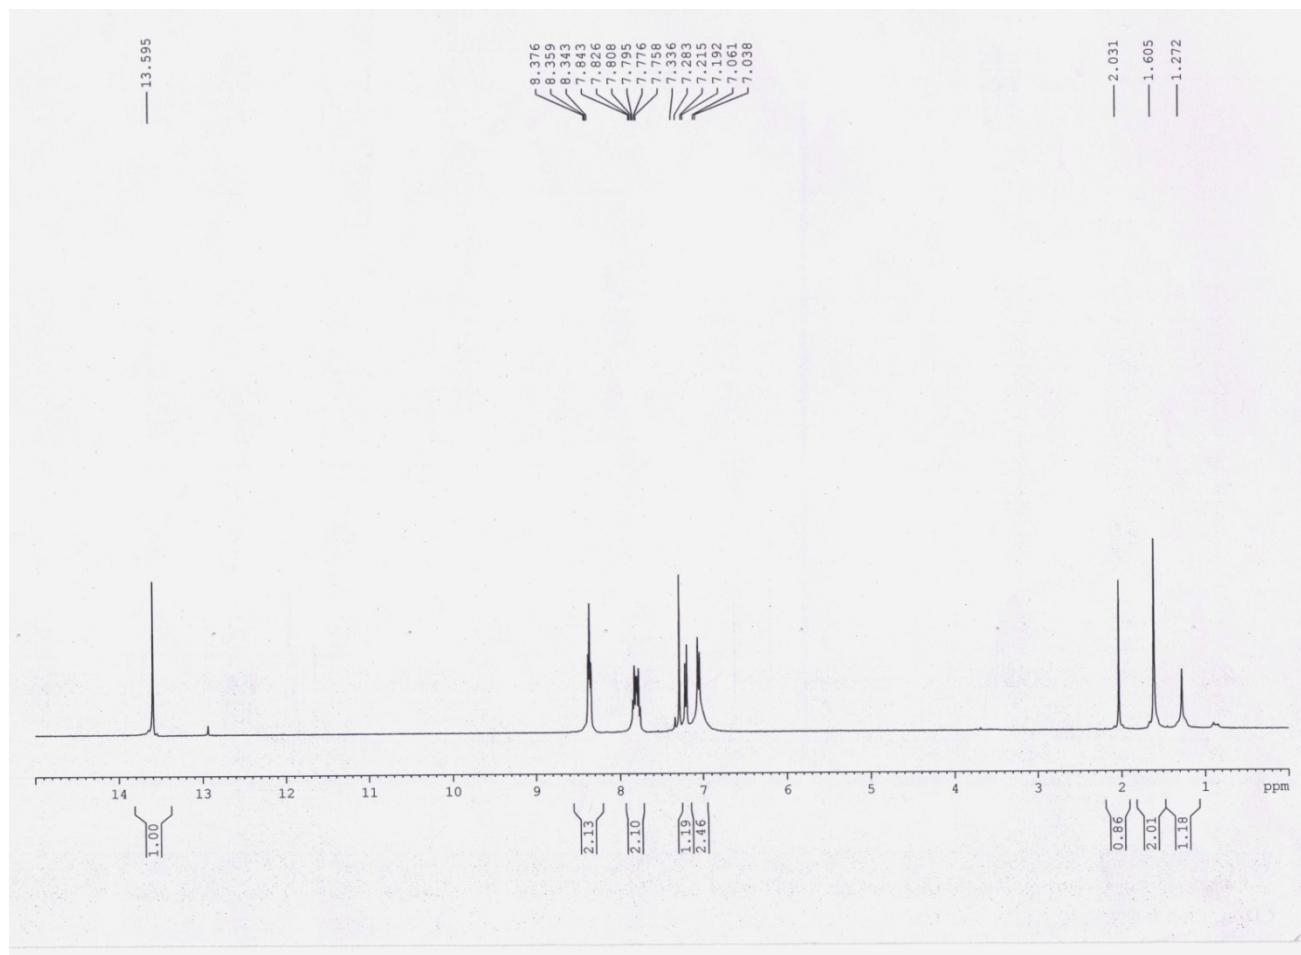

**Fig. S2**  $^1\text{H}$  NMR Spectra of the copper complex of 1-amino-4-hydroxy-9,10-anthraquinone.

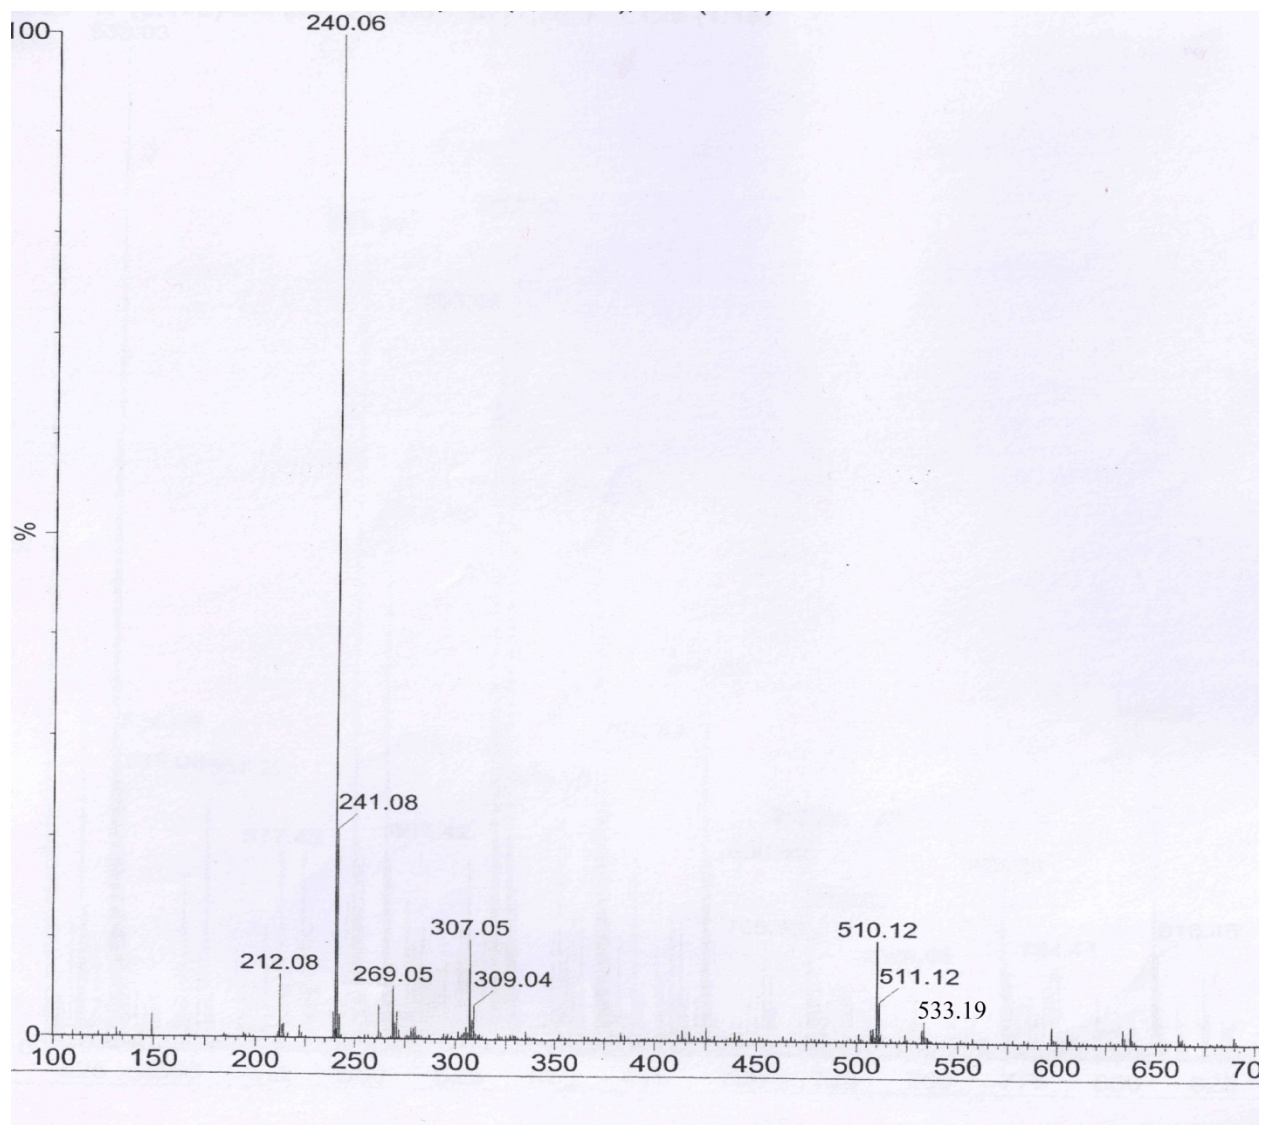

**Fig. S3** Mass spectra of the copper complex of 1-amino-4-hydroxy-9,10-anthraquinone.

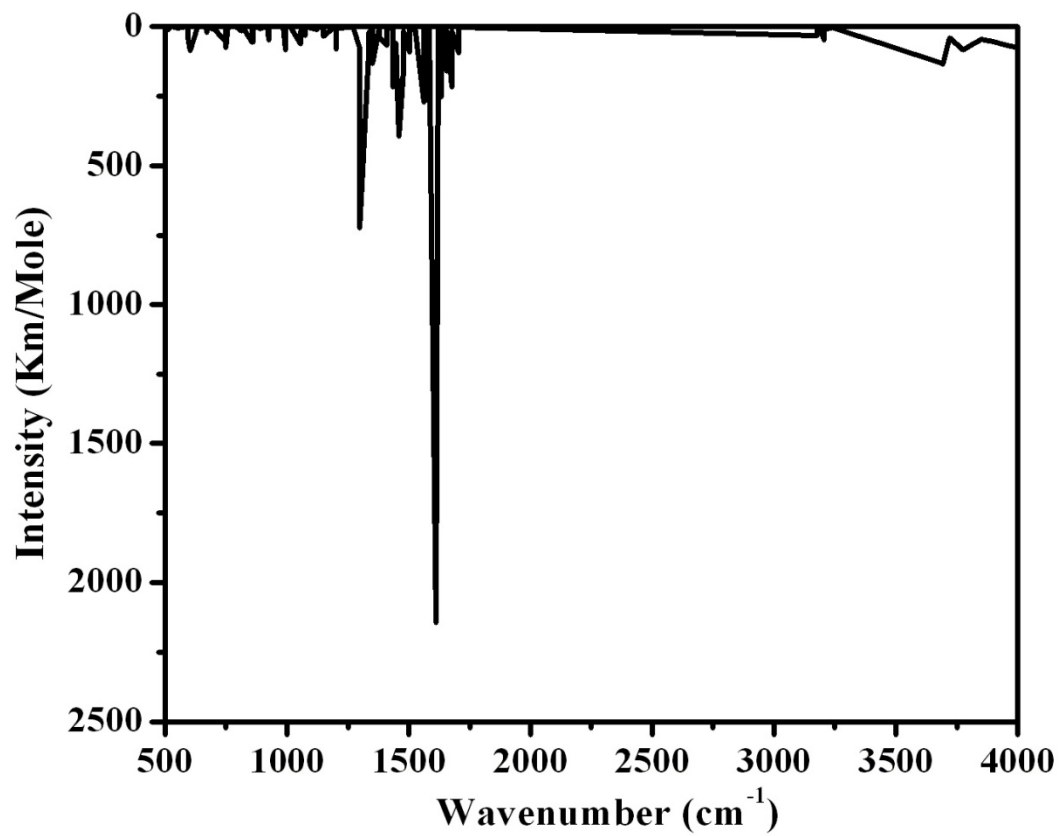

**Fig. S4** The theoretical vibrational spectra of copper complex.

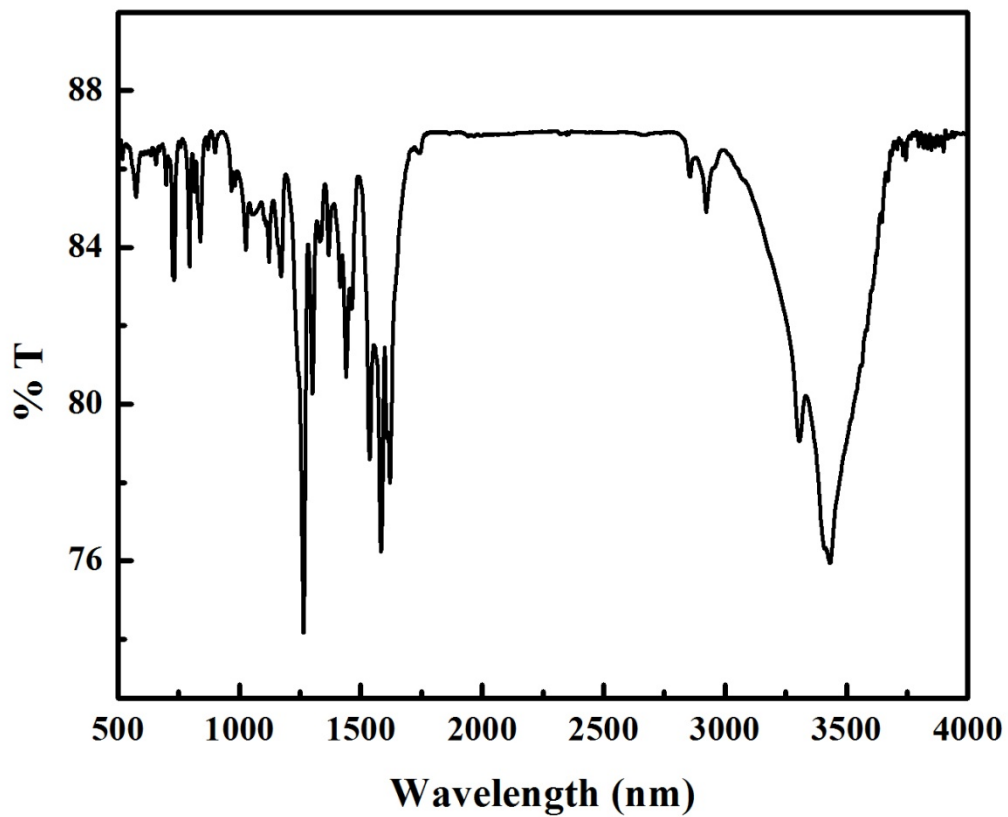

**Fig. S5** The experimental vibrational spectra of copper complex.

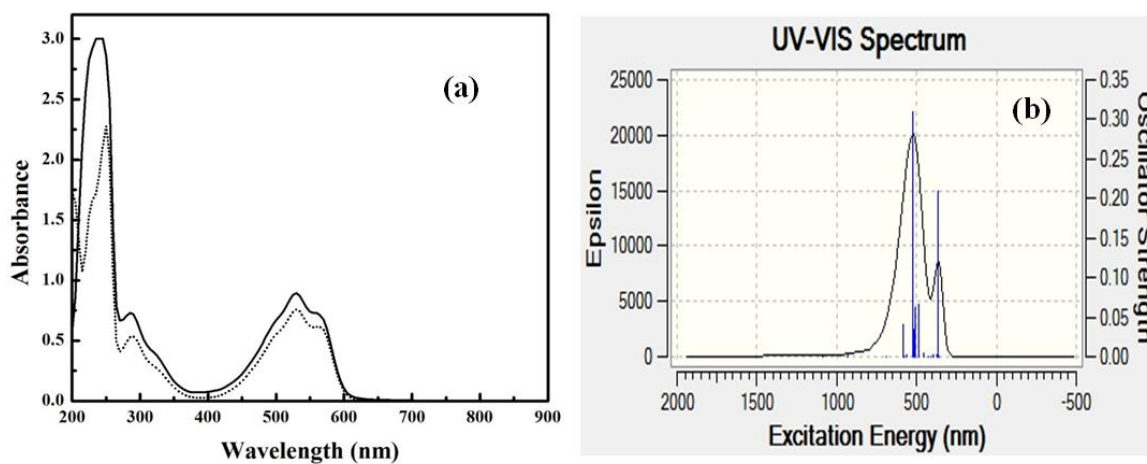

**Fig. S6 (a)** The UV-Vis spectra of 1-amino-4-hydroxy-9,10-anthraquinone (dotted line) and its copper complex (bold line) in 30% ethanol solution. **(b)** Theoretical UV-Vis spectrum of copper complex.

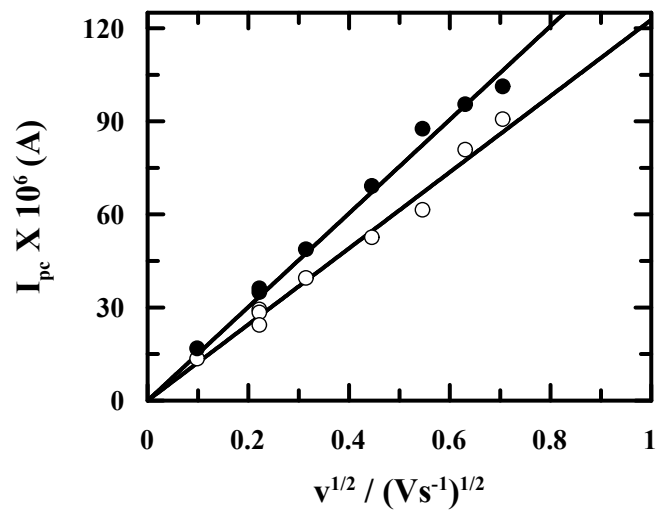

**Fig. S7** Plot of the cathodic peak current ( $I_{pc}$ ) with the square root of the scan rate ( $\sqrt{v}$ ) for both the first (o) and second (•) one-electron reductions of the copper complex in anhydrous dimethyl formamide.  $[\text{CuQ}_2] = 10^{-3} \text{ M}$ ,  $[\text{TBAB}] = 10^{-3} \text{ M}$  and temperature =  $25^\circ\text{C}$ .

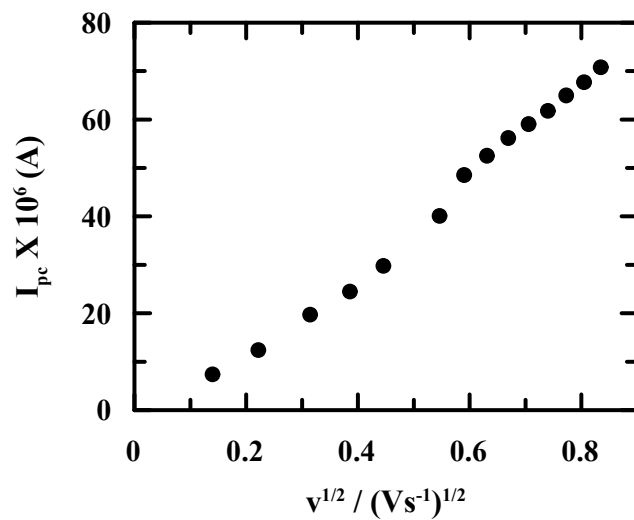

**Fig. S8** Plot of the cathodic peak current ( $I_{pc}$ ) with the square root of the scan rate ( $\sqrt{v}$ ) for the reduction of the copper complex in 20% dimethyl formamide.  $[\text{CuQ}_2] = 5 \times 10^{-5}$  M,  $[\text{TBAB}] = 10^{-3}$  M and temperature =  $25^\circ\text{C}$ .



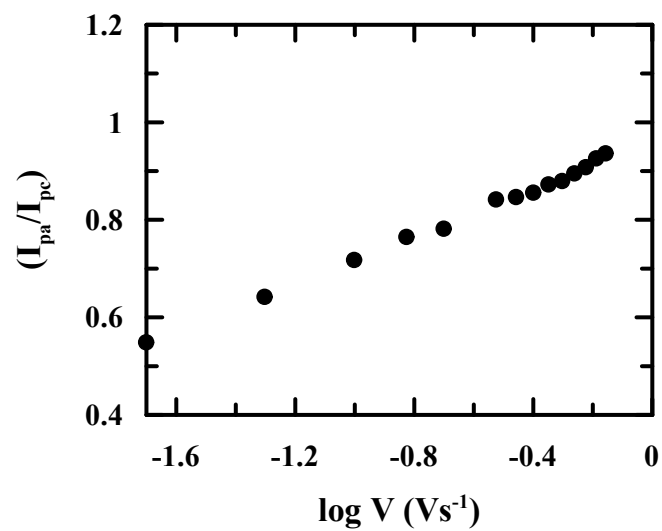

**Fig. S9** The plot of the ratio of anodic to cathodic peak current ( $I_{pa}/I_{pc}$ ) with the logarithm of scan rate ( $Vs^{-1}$ ) for the reduction of the copper complex in 20% DMF solution.

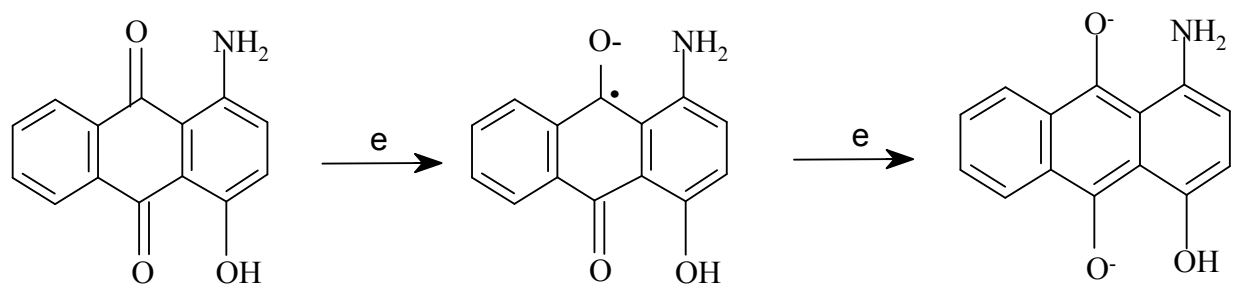

**Scheme-S1** Electrochemical reduction of 1-amino-4-hydroxy-9,10-anthraquinone in anhydrous dimethyl formamide.

**Table-S1:** Comparison of theoretical and experimental IR stretching frequency of the copper complex.

| $\nu_{\text{cal}} (\text{cm}^{-1})$ | $\nu_{\text{scaled}} (\text{cm}^{-1})$ | Intensity | PED (%)                                                                                                               | Interpretation                                                                                                                                                                                                                                                      | $\nu_{\text{expt}} (\text{cm}^{-1})$ |
|-------------------------------------|----------------------------------------|-----------|-----------------------------------------------------------------------------------------------------------------------|---------------------------------------------------------------------------------------------------------------------------------------------------------------------------------------------------------------------------------------------------------------------|--------------------------------------|
| 3690                                | 3547                                   | 122       | S <sub>1</sub> (82), S <sub>2</sub> (-18)<br>S <sub>3</sub> (-82) S <sub>4</sub> (18)                                 | $\nu_{\text{sym}} (\text{N}_{46}\text{-H}_{47})$ , $\nu_{\text{asym}} (\text{N}_{46}\text{-H}_{48})$<br>$\nu_{\text{asym}} (\text{N}_{50}\text{-H}_{51})$ $\nu_{\text{sym}} (\text{N}_{50}\text{-N}_{52})$                                                          | 3430                                 |
| 3469                                | 3334                                   | 151       | S <sub>3</sub> (-16), S <sub>4</sub> (75)                                                                             | $\nu_{\text{asym}} (\text{N}_{50}\text{-H}_{51})$ , $\nu_{\text{sym}} (\text{H}_{44}\text{C}_{36}\text{---C}_{37})$                                                                                                                                                 | 3410                                 |
| 3238                                | 3112                                   | 11.2      | S <sub>14</sub> (92)+ S <sub>8</sub> (-92)                                                                            | $\nu_{\text{asym}} (\text{C}_{31}\text{-H}_{43})$ + $\nu_{\text{asym}} (\text{C}_{18}\text{-H}_{23})$                                                                                                                                                               | 3205                                 |
| 3207                                | 3082                                   | 48        | S <sub>10</sub> (14), S <sub>12</sub> (79)                                                                            | $\nu_{\text{asym}} (\text{C}_{20}\text{-H}_{25})$ , $\nu_{\text{asym}} (\text{C}_{27}\text{-H}_{41})$                                                                                                                                                               | 2952                                 |
| 3191                                | 3067                                   | 15        | S <sub>10</sub> (69), S <sub>12</sub> (-14),<br>S <sub>1</sub> (15)                                                   | $\nu_{\text{sym}} (\text{C}_{20}\text{-H}_{25})$ , $\nu_{\text{asym}} (\text{C}_{27}\text{-H}_{41})$ , $\nu_{\text{asym}} (\text{N}_{46}\text{-H}_{47})$                                                                                                            | 2919                                 |
| 3177                                | 3054                                   | 33        | S <sub>6</sub> (89)+ S <sub>15</sub> (89)                                                                             | $\nu_{\text{sym}} (\text{C}_{27}\text{-C}_{28})$ , $\nu_{\text{asym}} (\text{N}_{46}\text{-H}_{48})$                                                                                                                                                                | 2849                                 |
| 1704                                | 1638                                   | 95        | S <sub>24</sub> (45)+ S <sub>20</sub> (32),<br>S <sub>118</sub> (21)                                                  | $\nu_{\text{sym}} (\text{O}_5\text{-C}_{10})$ , $\nu_{\text{sym}} (\text{O}_3\text{-C}_{32})$ , $\tau (\text{H}_{47}\text{-C}_{37}\text{-C}_{38}\text{-C}_{39})$                                                                                                    | 1618                                 |
| 1676                                | 1611                                   | 219       | S <sub>29</sub> (-44), S <sub>62</sub> (23)+<br>S <sub>144</sub> (18)                                                 | $\nu_{\text{asym}} (\text{C}_{14}\text{-C}_{20})$ , $\beta (\text{H}_{47}\text{-N}_{46}\text{-H}_{48})$<br>$\gamma (\text{O}_{49}\text{-C}_8\text{-C}_{15}\text{-C}_{12})$                                                                                          | 1607                                 |
| 1612                                | 1549                                   | 2147      | S <sub>35</sub> (-11), S <sub>62</sub> (-27),<br>S <sub>17</sub> (11) + S <sub>59</sub> (25)                          | $\nu_{\text{asym}} (\text{N}_{46}\text{-C}_7)$ , $\beta (\text{H}_{48}\text{-N}_{46}\text{-H}_{47})$ , $\nu_{\text{asym}} (\text{O}_{49}\text{-C}_{12})$ + C=O → Cu                                                                                                 | 1581                                 |
| 1560                                | 1499                                   | 272       | S <sub>23</sub> (-47), S <sub>75</sub> (11)<br>+ S <sub>143</sub> (34)                                                | $\nu_{\text{asym}} (\text{O}_4\text{-C}_{36})$ , $\beta (\text{H}_{45}\text{-N}_{38}\text{-H}_{39})$ ,<br>$\gamma (\text{O}_{53}\text{-C}_{29}\text{-C}_{34}\text{-C}_{33})$                                                                                        | 1535                                 |
| 1502                                | 1443                                   | 93        | S <sub>21</sub> (14), S <sub>34</sub> (-18),<br>S <sub>69</sub> (11)                                                  | $\nu_{\text{asym}} (\text{C}_6\text{-C}_{11})$ , $\nu_{\text{asym}} (\text{C}_{26}\text{-C}_{31})$ , $\beta (\text{H}_{25}\text{-C}_{20}\text{-C}_{19})$ ,                                                                                                          | 1461                                 |
| 1476                                | 1418                                   | 172       | S <sub>65</sub> (-10), S <sub>35</sub> (-10),<br>S <sub>62</sub> (16), S <sub>75</sub> (14),<br>S <sub>64</sub> (-10) | $\beta (\text{H}_{21}\text{-C}_6\text{-C}_{11})$ , $\nu_{\text{asym}} (\text{N}_{46}\text{-C}_7)$ , $\beta (\text{H}_{48}\text{-N}_{46}\text{-H}_{47})$ , $\beta (\text{H}_{45}\text{-N}_{38}\text{-H}_{39})$ , $\beta (\text{H}_{52}\text{-N}_{50}\text{-H}_{51})$ | 1438                                 |

|      |      |     |                                                                                            |                                                                                                                                                                                                      |      |
|------|------|-----|--------------------------------------------------------------------------------------------|------------------------------------------------------------------------------------------------------------------------------------------------------------------------------------------------------|------|
| 1433 | 1377 | 217 | S <sub>42</sub> (-44)                                                                      | $\nu_{\text{asym}}(\text{C}_9\text{-C}_{13})$                                                                                                                                                        | 1412 |
| 1409 | 1354 | 67  | S <sub>75</sub> (23)                                                                       | $\beta(\text{H}_{45}\text{-N}_{38}\text{-H}_{39})$                                                                                                                                                   | 1366 |
| 1349 | 1296 | 133 | S <sub>40</sub> (21)                                                                       | $\nu_{\text{asym}}(\text{C}_9\text{-C}_{10})$                                                                                                                                                        | 1299 |
| 1298 | 1247 | 722 | S <sub>47</sub> (-44), S <sub>48</sub> (-47)                                               | $\nu_{\text{asym}}(\text{C}_{12}\text{-C}_8), \nu_{\text{asym}}(\text{C}_{33}\text{-C}_{34})$                                                                                                        | 1262 |
| 1201 | 1149 | 89  | S <sub>70</sub> (42), S <sub>70</sub> (13),<br>S <sub>34</sub> (-12), S <sub>28</sub> (23) | $\beta(\text{H}_{40}\text{-C}_{26}\text{-C}_{31}), \beta(\text{H}_{40}\text{-C}_{26}\text{-C}_{31}), \nu_{\text{asym}}(\text{C}_{26}\text{-C}_{31}), \nu_{\text{asym}}(\text{C}_{30}\text{-C}_{31})$ | 1169 |
| 1149 | 1104 | 34  | S <sub>61</sub> (22)                                                                       | $\beta(\text{H}_{48}\text{-N}_{46}\text{-H}_{47})$                                                                                                                                                   | 1123 |
| 991  | 952  | 85  | S <sub>26</sub> (-20), S <sub>40</sub> (-14)                                               | $\nu_{\text{asym}}(\text{C}_{20}\text{-C}_{19}), \nu_{\text{asym}}(\text{C}_{10}\text{-C}_9)$                                                                                                        | 1024 |
| 922  | 886  | 47  | S <sub>58</sub> (-12), S <sub>88</sub> (14)                                                | $\beta(\text{C}_{33}\text{-C}_{34}\text{-C}_{39}), \beta(\text{C}_{19}\text{-C}_{18}\text{-C}_{16})$                                                                                                 | 839  |
| 860  | 826  | 57  | S <sub>119</sub> (74)                                                                      | $\tau(\text{H}_{45}\text{-C}_{38}\text{-C}_{39}\text{-N}_{50})$                                                                                                                                      | 814  |
| 748  | 719  | 75  | S <sub>115</sub> (-25)                                                                     | $\tau(\text{H}_{41}\text{-C}_{27}\text{-C}_{28}\text{-C}_{29})$                                                                                                                                      | 794  |
| 673  | 646  | 22  | S <sub>53</sub> (15)+S <sub>56</sub> (20)                                                  | $\beta(\text{C}_{15}\text{-C}_{16}\text{-C}_{18}), \beta(\text{C}_{34}\text{-C}_{39}\text{-C}_{38})$                                                                                                 | 726  |
| 604  | 580  | 86  | S <sub>51</sub> (-10), S <sub>90</sub> (12),<br>S <sub>52</sub> (-12)                      | $\nu_{\text{asym}}(\text{Cu}_1\text{-O}_4), \beta(\text{C}_{31}\text{-C}_{26}\text{-C}_{27}), \nu_{\text{asym}}(\text{Cu}_1\text{-O}_5)$                                                             | 656  |
| 595  | 572  | 38  | S <sub>151</sub> (34), S <sub>152</sub> (49),<br>S <sub>52</sub> (12)                      | $\tau(\text{C}_{11}\text{-C}_9\text{-O}_5\text{-C}_{10}), \tau(\text{C}_{37}\text{-C}_{35}\text{-O}_4\text{-C}_{36}), \nu_{\text{sym}}(\text{Cu}_1\text{-O}_5)$                                      | 571  |

[+ sign is used to indicate a combination mode]

**Table-S2:** Major contributions of Atomic Orbitals to the Molecular Orbitals involved in UV-visible transitions <sup>a</sup>

| <b>Molecular orbitals</b> | <b>% Contribution of atomic orbitals<sup>b</sup></b> |
|---------------------------|------------------------------------------------------|
| (HOMO-2) <sub>α</sub>     | Cu1-d=22 O5-p=15 O4-p=15 O2-p=12 O3-p=12             |
| (HOMO-1) <sub>α</sub>     | N46-p=9 N50-p=9                                      |
| (HOMO) <sub>α</sub>       | N46-p=9                                              |
| (LUMO) <sub>α</sub>       | C32-p=7 C36-p=7 C10-p=5 C13-p=5                      |
| (LUMO+1) <sub>α</sub>     | C13-p=7                                              |
| (LUMO+2) <sub>α</sub>     | C16-p=9                                              |
| (HOMO-3) <sub>β</sub>     | O49-p=32 O53-p=32                                    |
| (HOMO-2) <sub>β</sub>     | O53-p=18 O49-p=18                                    |
| (HOMO-1) <sub>β</sub>     | N50-p=9                                              |
| (HOMO) <sub>β</sub>       | N46-p=8                                              |
| (LUMO) <sub>β</sub>       | C32-p=7 C14-p=7 C15-p=7 C34-p=7 C35-p=7              |
| (LUMO+1) <sub>β</sub>     | C13-p=6                                              |

<sup>a</sup> Only atomic orbitals having 5% or more contributions are listed;

<sup>b</sup> Atom numbering scheme as in Figure 5.
